# Supplementary material for: Clinical Utility of 4C Mortality Scores among Japanese COVID-19 Patients: A Multicenter Study
Source: MDPI journal article supplement (doi:10.3390/jcm11030821), 2022-02-03
Supplement: s1 [file s1]

**Table S1.** Comparison of use of respiratory support in the COVID-19 patients, by outcomes.

|                                | <b>Overall</b> | <b>Survived</b> | <b>Dead</b> | <b><i>p</i>-value</b> |
|--------------------------------|----------------|-----------------|-------------|-----------------------|
| Use of respiratory support (%) |                |                 |             |                       |
| High flow nasal cannula        | 33 (16)        | 28 (17.8)       | 5 (23.8)    | 0.34                  |
| Non-invasive MV                | 1 (0.5)        | 1 (4.8)         | 0 (0)       | 0.10                  |
| Invasive MV                    | 37 (18.0)      | 28 (15.1)       | 9 (42.5)    | 0.004                 |
| ECMO                           | 3 (1.46)       | 1 (0.76)        | 2 (9.5)     | 0.03                  |

Shown are the respiratory supports that the patients were provided at their worst conditions. MV, mechanical ventilation; ECMO, extracorporeal membrane oxygenation.
